# Supplementary material for: Differences in Cancer Phenotypes Among Frequent CHEK2 Variants and Implications for Clinical Care—Checking CHEK2
Source: PubMed Central journal article supplement — JAMA Oncol. 2022 Sep 22;8(11):1598–606. doi: 10.1001/jamaoncol.2022.4071 (PMC9501803; doi:10.1001/jamaoncol.2022.4071), 2022-09-22
Supplement: jamaoncol-e224071-s001.pdf [file jamaoncol-e224071-s001.pdf]

## Supplemental Online Content

Bychkovsky BL, Agaoglu MB, Horton C, et al. Differences in cancer phenotypes among frequent *CHEK2* variants and implications for clinical care—checking *CHEK2*. *JAMA Oncol*. Published online September 15, 2022. doi:10.1001/jamaoncol.2022.4071

**eTable 1.** Comparison of *CHEK2* p.I157T to WT and *CHEK2* monoallelic pathogenic variants

**eTable 2.** Comparison of *CHEK2* p.S428F to WT and *CHEK2* monoallelic pathogenic variants

**eTable 3.** Comparison of *CHEK2* p.T476M to WT and *CHEK2* monoallelic pathogenic variants

**eTable 4.** Cancer Associations by WT vs. *CHEK2* Monoallelic pathogenic variants

**eTable 5.** Cancer Phenotype of Individual *CHEK2* PVs: R117G, c.1100del, ex8-9del, and c.444+1G>A compared to Wildtype and Other *CHEK2* PVs

**eTable 6.** Cohort Characteristics and Cancer Associations comparing *CHEK2* Monoallelic PV versus Biallelic PV

**eTable 7.** Cohort Characteristics and Cancer Associations of LOF versus missense *CHEK2* pathogenic variants

**eTable 8.** Cancer Phenotype of Individual *CHEK2* PVs: R117G, c.1100del, ex8-9del, and c.444 + 1G>A compared With Wildtype (WT) and Other *CHEK2* PVs

This supplemental material has been provided by the authors to give readers additional information about their work.

eTable1: Comparison of *CHEK2* p.I157T to WT and *CHEK2* monoallelic pathogenic variants

| Characteristic                   | WT         |       | <i>CHEK2</i> monoallelic PV* |       | p.I157T    |       | p.I157T vs. WT   |                 | p.I157T vs. <i>CHEK2</i> PV* |                 |
|----------------------------------|------------|-------|------------------------------|-------|------------|-------|------------------|-----------------|------------------------------|-----------------|
|                                  | No.        | %     | No.                          | %     | No.        | %     | OR (95% CI)      | P value         | OR (95% CI)                  | P value         |
| Age at first breast cancer (IQR) | 50 (43-59) |       | 47 (41-56)                   |       | 49 (42-57) |       |                  | 0.06            |                              | <b>0.02</b>     |
| Age at first cancer (IQR)        | 49 (42-58) |       | 47 (40-56)                   |       | 48 (41-58) |       |                  | 0.13            |                              | 0.03***         |
| Race, ethnicity and ancestry     |            |       |                              |       |            |       |                  |                 |                              |                 |
| African American/Black           | 1815       | 5.5%  | 37                           | 1.7%  | 3          | 0.3%  | 0.04 (0.01-0.12) | <b>&lt;.001</b> | 0.16 (0.03-0.51)             | <b>&lt;.001</b> |
| Ashkenazi Jewish                 | 2247       | 6.8%  | 92                           | 4.2%  | 34         | 3.4%  | 0.38 (0.26-0.54) | <b>&lt;.001</b> | 0.73 (0.47-1.11)             | 0.15            |
| Asian                            | 1071       | 3.2%  | 20                           | 0.9%  | 0          | 0.0%  | 0 (0-0.09)       | <b>&lt;.001</b> | 0 (0-0.4)                    | <b>&lt;.001</b> |
| White                            | 21907      | 66.3% | 1707                         | 78.7% | 862        | 86.9% |                  |                 |                              |                 |
| Hispanic                         | 1582       | 4.8%  | 66                           | 3.0%  | 6          | 0.6%  | 0.1 (0.04-0.21)  | <b>&lt;.001</b> | 0.18 (0.06-0.42)             | <b>&lt;.001</b> |
| Other                            | 4409       | 13.4% | 246                          | 11.4% | 87         | 8.8%  | 0.5 (0.4-0.63)   | <b>&lt;.001</b> | 0.7 (0.53-0.91)              | <b>0.006</b>    |
| Any Cancer                       |            |       |                              |       |            |       | 1.19 (1.03-1.38) | <b>0.015</b>    | 0.84 (0.7-1)                 | 0.04***         |
| Yes                              | 23065      | 69.8% | 1664                         | 76.8% | 728        | 73.4% |                  |                 |                              |                 |
| No                               | 9969       | 30.2% | 504                          | 23.3% | 264        | 26.6% |                  |                 |                              |                 |
| No. of primary cancer            |            |       |                              |       |            |       |                  |                 |                              |                 |
| 0                                | 9969       | 30.2% | 504                          | 23.3% | 264        | 26.6% |                  |                 |                              |                 |
| 1                                | 18498      | 56.0% | 1348                         | 62.2% | 591        | 59.6% |                  |                 |                              |                 |
| >1                               | 4567       | 13.8% | 316                          | 14.6% | 137        | 13.8% |                  | <b>0.046</b>    |                              | 0.12            |
| Breast cancer**                  |            |       |                              |       |            |       | 1.21 (1.06-1.39) | <b>0.005***</b> | 0.66 (0.56-0.78)             | <b>&lt;.001</b> |
| Yes                              | 16029      | 52.7% | 1339                         | 67.1% | 524        | 57.7% |                  |                 |                              |                 |
| No                               | 13584      | 44.6% | 620                          | 31.1% | 366        | 40.3% |                  |                 |                              |                 |
| Bilateral breast cancer**        |            |       |                              |       |            |       | 1.52 (1.23-1.89) | <b>&lt;.001</b> | 0.77 (0.60-0.98)             | 0.03***         |
| Yes                              | 2228       | 7.3%  | 273                          | 13.7% | 98         | 10.8% |                  |                 |                              |                 |
| No                               | 27345      | 89.9% | 1683                         | 84.4% | 789        | 86.9% |                  |                 |                              |                 |
| Colorectal cancer                |            |       |                              |       |            |       | 0.8 (0.61-1.04)  | 0.09            | 1.29 (0.92-1.79)             | 0.13            |
| Yes                              | 2575       | 7.8%  | 109                          | 5.0%  | 63         | 6.4%  |                  |                 |                              |                 |
| No                               | 29550      | 89.5% | 2015                         | 92.9% | 904        | 91.1% |                  |                 |                              |                 |
| Kidney cancer                    |            |       |                              |       |            |       | 1.71 (0.84-3.15) | 0.11            | 0.67 (0.31-1.35)             | 0.27            |
| Yes                              | 214        | 0.7%  | 36                           | 1.7%  | 11         | 1.1%  |                  |                 |                              |                 |

|                   |       |       |      |       |     |       |                  |      |                  |      |
|-------------------|-------|-------|------|-------|-----|-------|------------------|------|------------------|------|
| No                | 31896 | 96.6% | 2088 | 96.3% | 956 | 96.4% |                  |      |                  |      |
| Melanoma          |       |       |      |       |     |       | 0.68 (0.44-1)    | 0.05 | 0.95 (0.57-1.54) | 0.91 |
| Yes               | 1259  | 3.8%  | 60   | 2.8%  | 26  | 2.6%  |                  |      |                  |      |
| No                | 30854 | 93.4% | 2064 | 95.2% | 941 | 94.9% |                  |      |                  |      |
| Pancreatic cancer |       |       |      |       |     |       | 0.72 (0.38-1.25) | 0.28 | 1.43 (0.65-3.04) | 0.35 |
| Yes               | 597   | 1.8%  | 20   | 0.9%  | 13  | 1.3%  |                  |      |                  |      |
| No                | 31517 | 95.4% | 2104 | 97.1% | 954 | 96.2% |                  |      |                  |      |
| Thyroid cancer    |       |       |      |       |     |       | 1.4 (0.92-2.04)  | 0.09 | 0.86 (0.53-1.34) | 0.52 |
| Yes               | 696   | 2.1%  | 74   | 3.4%  | 29  | 2.9%  |                  |      |                  |      |
| No                | 31416 | 95.1% | 2050 | 94.6% | 938 | 94.6% |                  |      |                  |      |

\**CHEK2* PV – pathogenic and likely pathogenic variants in *CHEK2* excluding the lower risk *CHEK2* variants: p.I157T, p.S428F and p.T476M

\*\*Denominator for sex-specific cancers was total number of females with given variant for breast and bilateral breast cancer.

\*\*\*After Bonferroni correction, this P value is not significant.

Abbreviations: CI, confidence interval; IQR, interquartile range; OR, odds ratio; PV, pathogenic or likely pathogenic variant; WT, wildtype

eTable2: Comparison of *CHEK2* p.S428F to WT and *CHEK2* monoallelic pathogenic variants

| Characteristic                   | WT         |       | <i>CHEK2</i><br>monoallelic PV* |       | p.S428F       |       | p.S428F vs. WT     |             | p.S428F vs. <i>CHEK2</i> PV* |         |
|----------------------------------|------------|-------|---------------------------------|-------|---------------|-------|--------------------|-------------|------------------------------|---------|
|                                  | No.        | %     | No.                             | %     | No.           | %     | OR (95% CI)        | P value     | OR (95% CI)                  | P value |
| Age at first breast cancer (IQR) | 50 (43-59) |       | 47 (41-56)                      |       | 52 (44-61)    |       |                    | 0.07        |                              | <.001   |
| Age at first cancer (IQR)        | 49 (42-58) |       | 47 (40-56)                      |       | 50 (43-59.75) |       |                    | 0.09        |                              | <.001   |
| Race, ethnicity and ancestry     |            |       |                                 |       |               |       |                    |             |                              |         |
| African American/Black           | 1815       | 5.5%  | 37                              | 1.7%  | 0             | 0.0%  | 0 (0-0.82)         | <b>0.02</b> | 0 (0-3.3)                    | 0.63    |
| Ashkenazi Jewish                 | 2247       | 6.8%  | 92                              | 4.2%  | 245           | 75.6% | 42.6 (31.66-58.23) | <.001       | 80.91 (55.95-118.43)         | <.001   |
| Asian                            | 1071       | 3.2%  | 20                              | 0.9%  | 0             | 0.0%  | 0 (0-1.4)          | 0.11        | 0 (0-6.37)                   | >.99    |
| White                            | 21907      | 66.3% | 1707                            | 78.7% | 56            | 17.3% |                    |             |                              |         |
| Hispanic                         | 1582       | 4.8%  | 66                              | 3.0%  | 1             | 0.3%  | 0.25 (0.01-1.44)   | 0.18        | 0.46 (0.01-2.77)             | 0.72    |
| Other                            | 4409       | 13.4% | 246                             | 11.4% | 22            | 6.8%  | 1.95 (1.13-3.25)   | <b>0.01</b> | 2.72 (1.55-4.63)             | <.001   |
| Any Cancer                       |            |       |                                 |       |               |       | 0.72 (0.57-0.9)    | 0.004***    | 0.5 (0.39-0.65)              | <.001   |
| Yes                              | 23065      | 69.8% | 1664                            | 76.8% | 202           | 62.4% |                    |             |                              |         |
| No                               | 9969       | 30.2% | 504                             | 23.3% | 122           | 37.7% |                    |             |                              |         |
| No. of primary cancer            |            |       |                                 |       |               |       |                    |             |                              |         |
| 0                                | 9969       | 30.2% | 504                             | 23.3% | 122           | 37.7% |                    |             |                              |         |
| 1                                | 18498      | 56.0% | 1348                            | 62.2% | 166           | 51.2% |                    |             |                              |         |
| >1                               | 4567       | 13.8% | 316                             | 14.6% | 36            | 11.1% |                    | <b>0.02</b> |                              | <.001   |
| Breast cancer**                  |            |       |                                 |       |               |       | 1.08 (0.86-1.37)   | 0.51        | 0.59 (0.46-0.76)             | <.001   |
| Yes                              | 16029      | 52.7% | 1339                            | 67.1% | 161           | 54.8% |                    |             |                              |         |
| No                               | 13584      | 44.6% | 620                             | 31.1% | 126           | 42.9% |                    |             |                              |         |
| Bilateral breast cancer**        |            |       |                                 |       |               |       | 0.87 (0.55-1.39)   | 0.56        | 0.44 (0.27-0.71)             | <.001   |
| Yes                              | 2228       | 7.3%  | 273                             | 13.7% | 19            | 6.5%  |                    |             |                              |         |
| No                               | 27345      | 89.9% | 1683                            | 84.4% | 268           | 91.2% |                    |             |                              |         |
| Colorectal cancer                |            |       |                                 |       |               |       | 0.26 (0.1-0.55)    | <.001       | 0.42 (0.16-0.91)             | 0.02*** |
| Yes                              | 2575       | 7.8%  | 109                             | 5.0%  | 7             | 2.2%  |                    |             |                              |         |
| No                               | 29550      | 89.5% | 2015                            | 92.9% | 307           | 94.8% |                    |             |                              |         |
| Kidney cancer                    |            |       |                                 |       |               |       | 1.44 (0.29-4.3)    | 0.47        | 0.56 (0.11-1.79)             | 0.47    |
| Yes                              | 214        | 0.7%  | 36                              | 1.7%  | 3             | 0.9%  |                    |             |                              |         |

|                   |       |       |      |       |     |       |                  |      |                  |      |
|-------------------|-------|-------|------|-------|-----|-------|------------------|------|------------------|------|
| No                | 31896 | 96.6% | 2088 | 96.3% | 311 | 96.0% |                  |      |                  |      |
| Melanoma          |       |       |      |       |     |       | 0.97 (0.5-1.73)  | >.99 | 1.37 (0.66-2.6)  | 0.37 |
| Yes               | 1259  | 3.8%  | 60   | 2.8%  | 12  | 3.7%  |                  |      |                  |      |
| No                | 30854 | 93.4% | 2064 | 95.2% | 302 | 93.2% |                  |      |                  |      |
| Pancreatic cancer |       |       |      |       |     |       | 0.34 (0.04-1.24) | 0.14 | 0.67 (0.08-2.8)  | >.99 |
| Yes               | 597   | 1.8%  | 20   | 0.9%  | 2   | 0.6%  |                  |      |                  |      |
| No                | 31517 | 95.4% | 2104 | 97.1% | 312 | 96.3% |                  |      |                  |      |
| Thyroid cancer    |       |       |      |       |     |       | 1.03 (0.41-2.16) | 0.85 | 0.63 (0.24-1.39) | 0.31 |
| Yes               | 696   | 2.1%  | 74   | 3.4%  | 7   | 2.2%  |                  |      |                  |      |
| No                | 31416 | 95.1% | 2050 | 94.6% | 307 | 94.8% |                  |      |                  |      |

\**CHEK2* PV – pathogenic and likely pathogenic variants in *CHEK2* excluding the lower risk *CHEK2* variants: p.I157T, p.S428F and p.T476M.

\*\*Denominator for sex-specific cancers was total number of females with given variant for breast and bilateral breast cancer.

\*\*\*After Bonferroni correction, this P value is not significant.

Abbreviations: CI, confidence interval; IQR, interquartile range; OR, odds ratio; PV, pathogenic or likely pathogenic variant; WT, wildtype

eTable3: Comparison of *CHEK2* p.T476M to WT and *CHEK2* monoallelic pathogenic variants

| Characteristic                   | WT         |       | <i>CHEK2</i> monoallelic PV* |       | p.T476M      |       | p.T476M vs. WT   |                 | p.T476M vs. <i>CHEK2</i> PV* |                 |
|----------------------------------|------------|-------|------------------------------|-------|--------------|-------|------------------|-----------------|------------------------------|-----------------|
|                                  | No.        | %     | No.                          | %     | No.          | %     | OR (95% CI)      | P value         | OR (95% CI)                  | P value         |
| Age at first breast cancer (IQR) | 50 (43-59) |       | 47 (41-56)                   |       | 49 (42-57.5) |       |                  | 0.50            |                              | 0.10            |
| Age at first cancer (IQR)        | 49 (42-58) |       | 47 (40-56)                   |       | 48.5 (42-57) |       |                  | 0.44            |                              | 0.20            |
| Race, ethnicity and ancestry     |            |       |                              |       |              |       |                  |                 |                              |                 |
| African American/Black           | 1815       | 5.5%  | 37                           | 1.7%  | 5            | 2.0%  | 0.36 (0.12-0.86) | <b>0.01</b>     | 1.38 (0.42-3.59)             | 0.42            |
| Ashkenazi Jewish                 | 2247       | 6.8%  | 92                           | 4.2%  | 3            | 1.2%  | 0.18 (0.04-0.52) | <b>&lt;.001</b> | 0.33 (0.07-1.02)             | 0.06            |
| Asian                            | 1071       | 3.2%  | 20                           | 0.9%  | 2            | 0.8%  | 0.24 (0.03-0.9)  | <b>0.03</b>     | 1.02 (0.11-4.27)             | >.99            |
| White                            | 21907      | 66.3% | 1707                         | 78.7% | 167          | 66.8% |                  |                 |                              |                 |
| Hispanic                         | 1582       | 4.8%  | 66                           | 3.0%  | 10           | 4.0%  | 0.83 (0.39-1.57) | 0.65            | 1.55 (0.7-3.1)               | 0.22            |
| Other                            | 4409       | 13.4% | 246                          | 11.4% | 63           | 25.2% | 1.87 (1.38-2.52) | <b>&lt;.001</b> | 2.62 (1.87-3.63)             | <b>&lt;.001</b> |
| Any Cancer                       |            |       |                              |       |              |       | 1.11 (0.84-1.49) | 0.49            | 0.78 (0.58-1.06)             | 0.10            |
| Yes                              | 23065      | 69.8% | 1664                         | 76.8% | 180          | 72.0% |                  |                 |                              |                 |
| No                               | 9969       | 30.2% | 504                          | 23.3% | 70           | 28.0% |                  |                 |                              |                 |
| No. of primary cancer            |            |       |                              |       |              |       |                  |                 |                              |                 |
| 0                                | 9969       | 30.2% | 504                          | 23.3% | 70           | 28.0% |                  |                 |                              |                 |
| 1                                | 18498      | 56.0% | 1348                         | 62.2% | 153          | 61.2% |                  |                 |                              |                 |
| >1                               | 4567       | 13.8% | 316                          | 14.6% | 27           | 10.8% |                  | 0.21            |                              | 0.11            |
| Breast cancer**                  |            |       |                              |       |              |       | 1.35 (1.03-1.77) | 0.03***         | 0.74 (0.56-0.98)             | 0.04***         |
| Yes                              | 16029      | 52.7% | 1339                         | 67.1% | 139          | 59.9% |                  |                 |                              |                 |
| No                               | 13584      | 44.6% | 620                          | 31.1% | 87           | 37.5% |                  |                 |                              |                 |
| Bilateral breast cancer**        |            |       |                              |       |              |       | 1.46 (0.95-2.23) | 0.08            | 0.73 (0.47-1.14)             | 0.17            |
| Yes                              | 2228       | 7.3%  | 273                          | 13.7% | 24           | 10.3% |                  |                 |                              |                 |
| No                               | 27345      | 89.9% | 1683                         | 84.4% | 202          | 87.1% |                  |                 |                              |                 |
| Colorectal cancer                |            |       |                              |       |              |       | 0.86 (0.49-1.41) | 0.64            | 1.38 (0.76-2.37)             | 0.23            |
| Yes                              | 2575       | 7.8%  | 109                          | 5.0%  | 17           | 6.8%  |                  |                 |                              |                 |
| No                               | 29550      | 89.5% | 2015                         | 92.9% | 227          | 90.8% |                  |                 |                              |                 |
| Kidney cancer                    |            |       |                              |       |              |       | 1.86 (0.38-5.56) | 0.23            | 0.72 (0.14-2.31)             | 0.79            |
| Yes                              | 214        | 0.7%  | 36                           | 1.7%  | 3            | 1.2%  |                  |                 |                              |                 |

|                   |       |       |      |       |     |       |                  |      |                  |      |
|-------------------|-------|-------|------|-------|-----|-------|------------------|------|------------------|------|
| No                | 31896 | 96.6% | 2088 | 96.3% | 241 | 96.4% |                  |      |                  |      |
| Melanoma          |       |       |      |       |     |       | 0.51 (0.16-1.22) | 0.18 | 0.72 (0.22-1.8)  | 0.68 |
| Yes               | 1259  | 3.8%  | 60   | 2.8%  | 5   | 2.0%  |                  |      |                  |      |
| No                | 30854 | 93.4% | 2064 | 95.2% | 239 | 95.6% |                  |      |                  |      |
| Pancreatic cancer |       |       |      |       |     |       | 0.66 (0.13-1.95) | 0.64 | 1.31 (0.25-4.46) | 0.73 |
| Yes               | 597   | 1.8%  | 20   | 0.9%  | 3   | 1.2%  |                  |      |                  |      |
| No                | 31517 | 95.4% | 2104 | 97.1% | 241 | 96.4% |                  |      |                  |      |
| Thyroid cancer    |       |       |      |       |     |       | 1.33 (0.53-2.8)  | 0.38 | 0.82 (0.31-1.8)  | 0.85 |
| Yes               | 696   | 2.1%  | 74   | 3.4%  | 7   | 2.8%  |                  |      |                  |      |
| No                | 31416 | 95.1% | 2050 | 94.6% | 237 | 94.8% |                  |      |                  |      |

\**CHEK2* PV – pathogenic and likely pathogenic variants in *CHEK2* excluding the lower risk *CHEK2* variants: p.I157T, p.S428F and p.T476M

\*\*Denominator for sex-specific cancers was total number of females with given variant for breast and bilateral breast cancer.

\*\*\*After Bonferroni correction, this P value is not significant.

Abbreviations: CI, confidence interval; IQR, interquartile range; OR, odds ratio; PV, pathogenic or likely pathogenic variant; WT, wildtype

eTable4: Cancer Associations by WT vs. *CHEK2* Monoallelic pathogenic variants

| Characteristic      | WT    |       | <i>CHEK2</i> monoallelic PV* |       | WT vs. <i>CHEK2</i> monoallelic PV |         |
|---------------------|-------|-------|------------------------------|-------|------------------------------------|---------|
|                     | No.   | %     | No.                          | %     | OR (95% CI)                        | P value |
| Adrenal cancer      |       |       |                              |       | 0 (0-6.75)                         | >.99    |
| Yes                 | 10    | 0.03% | 0                            | 0.0%  |                                    |         |
| No                  | 32101 | 97.2% | 2124                         | 98.0% |                                    |         |
| Brain cancer        |       |       |                              |       | 1.39 (0.74-2.4)                    | 0.26    |
| Yes                 | 153   | 0.5%  | 14                           | 0.7%  |                                    |         |
| No                  | 31957 | 96.7% | 2110                         | 97.3% |                                    |         |
| Endometrial cancer* |       |       |                              |       | 0.48 (0.34-0.66)                   | <.001   |
| Yes                 | 1291  | 4.2%  | 42                           | 2.1%  |                                    |         |
| No                  | 28285 | 93.0% | 1914                         | 95.9% |                                    |         |
| Gastric cancer      |       |       |                              |       | 0.81 (0.38-1.52)                   | 0.66    |
| Yes                 | 187   | 0.6%  | 10                           | 0.5%  |                                    |         |
| No                  | 31925 | 96.6% | 2114                         | 97.5% |                                    |         |
| Sarcoma             |       |       |                              |       | 0.86 (0.49-1.43)                   | 0.72    |
| Yes                 | 280   | 0.9%  | 16                           | 0.7%  |                                    |         |
| No                  | 31830 | 96.4% | 2108                         | 97.2% |                                    |         |
| Prostate cancer*    |       |       |                              |       | 1.07 (0.65-1.7)                    | 0.72    |
| Yes                 | 329   | 12.6% | 23                           | 13.4% |                                    |         |
| No                  | 2211  | 84.9% | 144                          | 83.7% |                                    |         |
| Ovarian cancer*     |       |       |                              |       | 0.98 (0.79-1.21)                   | 0.92    |
| Yes                 | 1521  | 5.0%  | 99                           | 5.0%  |                                    |         |
| No                  | 28057 | 92.2% | 1858                         | 93.1% |                                    |         |

\*Denominator for sex-specific cancers was total number of females with endometrial and ovarian cancer and total number of males with prostate cancer.

Abbreviations: CI, confidence interval; OR, odds ratio; PV, pathogenic or likely pathogenic variant; WT, wildtype



eTable5: Cancer Phenotype of Individual *CHEK2* PVs: R117G, c.1100del, ex8-9del, and c.444+1G>A compared to Wildtype and Other *CHEK2* PVs

|                       | <b>p.R117G</b>   | <b>R117G vs. WT</b>     |                | <b>R117G vs. Other PV*</b>     |                | <b>c.444+1G&gt;A</b> | <b>c.444+1G&gt;A vs. WT</b> |                | <b>c.444+1G&gt;A vs. Other PV*</b> |                |
|-----------------------|------------------|-------------------------|----------------|--------------------------------|----------------|----------------------|-----------------------------|----------------|------------------------------------|----------------|
|                       | (n=125)          |                         |                |                                |                | (n=92)               |                             |                |                                    |                |
| <b>Characteristic</b> | <b>No. (%)</b>   | <b>OR (95% CI)</b>      | <b>P value</b> | <b>OR (95% CI)</b>             | <b>P value</b> | <b>No. (%)</b>       | <b>OR (95% CI)</b>          | <b>P value</b> | <b>OR (95% CI)</b>                 | <b>P value</b> |
| Adrenal cancer        | 0 (0.0%)         | 1                       | >.99           | 1                              | >.99           | 0 (0.0%)             | 1                           | >.99           | 1                                  | >.99           |
| Brain cancer          | 1 (0.8%)         | 1.71 (0.04-9.86)        | 0.45           | 1.25 (0.03-8.48)               | 0.57           | 1 (1.1%)             | 2.35 (0.06-13.61)           | 0.35           | 1.75 (0.04-11.87)                  | 0.46           |
| Endometrial cancer*   | 3 (0.7%)         | 0.6 (0.12-1.81)         | 0.64           | 1.27 (0.25-4.11)               | 0.73           | 1 (1.2%)             | 0.27 (0.01-1.55)            | 0.27           | 0.55 (0.01-3.34)                   | >.99           |
| Gastric cancer        | 0 (0.0%)         | 0 (0-5.25)              | >.99           | 0 (0-7.31)                     | >.99           | 1 (1.1%)             | 1.92 (0.05-11.09)           | 0.41           | 2.53 (0.06-18.58)                  | 0.35           |
| Sarcoma               | 1 (0.8%)         | 0.93 (0.02-5.33)        | >.99           | 1.09 (0.03-7.17)               | 0.62           | 0 (0.0%)             | 0 (0-4.79)                  | >.99           | 0 (0-5.92)                         | >.99           |
| Prostate cancer*      | 2 (16.7%)        | 1.49 (0.16-7.26)        | 0.64           | 1.43 (0.14-7.6)                | 0.65           | 1 (12.5%)            | 0.96 (0.02-7.51)            | >.99           | 0.89 (0.02-7.5)                    | >.99           |
| Ovarian cancer*       | 5 (4.4%)         | 0.86 (0.27-2.08)        | >.99           | 0.87 (0.27-2.17)               | >.99           | 4 (4.8%)             | 0.95 (0.25-2.53)            | >.99           | 0.96 (0.25-2.64)                   | >.99           |
|                       |                  |                         |                |                                |                |                      |                             |                |                                    |                |
|                       | <b>c.1100del</b> | <b>c.1100del vs. WT</b> |                | <b>c.1100del vs. Other PV*</b> |                | <b>Ex8-9del</b>      | <b>Ex8-9del vs. WT</b>      |                | <b>Ex8-9del vs. Other PV*</b>      |                |
|                       | (n=1252)         |                         |                |                                |                | (n=113)              |                             |                |                                    |                |
| <b>Characteristic</b> | <b>No. (%)</b>   | <b>OR (95% CI)</b>      | <b>P value</b> | <b>OR (95% CI)</b>             | <b>P value</b> | <b>No. (%)</b>       | <b>OR (95% CI)</b>          | <b>P value</b> | <b>OR (95% CI)</b>                 | <b>P value</b> |
| Adrenal cancer        | 0 (0.0%)         | 1                       | >.99           | 1                              | >.99           | 0 (0.0%)             | 1                           | >.99           | 1                                  | >.99           |
| Brain cancer          | 8 (0.6%)         | 1.38 (0.58-2.79)        | 0.394          | 0.98 (0.3-3.45)                | >.99           | 1 (0.9%)             | 1.88 (0.05-10.86)           | 0.42           | 1.39 (0.03-9.38)                   | 0.53           |
| Endometrial cancer*   | 23 (2.0%)        | 0.46 (0.29-0.69)        | <.001          | 0.9 (0.46-1.76)                | 0.75           | 2 (1.9%)             | 0.42 (0.05-1.56)            | 0.33           | 0.87 (0.1-3.44)                    | >.99           |
| Gastric cancer        | 6 (0.5%)         | 0.84 (0.3-1.87)         | 0.85           | 1.11 (0.26-5.34)               | >.99           | 1 (0.9%)             | 1.54 (0.04-8.85)            | 0.48           | 2 (0.05-14.68)                     | 0.42           |
| Sarcoma               | 12 (1.0%)        | 1.13 (0.57-2.01)        | 0.64           | 2.22 (0.67-9.48)               | 0.21           | 0 (0.0%)             | 0 (0-3.83)                  | >.99           | 0 (0-4.69)                         | >.99           |
| Prostate cancer*      | 10 (9.6%)        | 0.75 (0.34-1.46)        | 0.45           | 0.46 (0.17-1.23)               | 0.11           | 1 (16.7%)            | 1.34 (0.03-12.06)           | 0.57           | 1.26 (0.03-12.07)                  | 0.60           |
| Ovarian cancer*       | 54 (4.7%)        | 0.93 (0.69-1.23)        | 0.68           | 0.89 (0.58-1.36)               | 0.60           | 3 (2.8%)             | 0.54 (0.11-1.62)            | 0.38           | 0.53 (0.11-1.65)                   | 0.37           |

\*Denominator for sex-specific cancers was total number of females with endometrial and ovarian cancer and total number of males with prostate cancer.

Abbreviations: CI, confidence interval; OR, odds ratio; PV, pathogenic or likely pathogenic variant; WT, wildtype

eTable6: Cohort Characteristics and Cancer Associations comparing *CHEK2* Monoallelic PV versus Biallelic PV

| Characteristic                   | WT         |       | <i>CHEK2</i> monoallelic PVs* |       | <i>CHEK2</i> biallelic PV* |       | Biallelic PV* vs. WT |                 | Biallelic vs. Monoallelic PV* |                 |
|----------------------------------|------------|-------|-------------------------------|-------|----------------------------|-------|----------------------|-----------------|-------------------------------|-----------------|
|                                  | No.        | %     | No.                           | %     | No.                        | %     | OR (95% CI)          | P value         | OR (95% CI)                   | P value         |
| Age at first breast cancer (IQR) | 50 (43-59) |       | 47 (41-56)                    |       | 40.5 (35-48)               |       |                      | <b>0.001</b>    |                               | <b>0.016</b>    |
| Age at first cancer (IQR)        | 49 (42-58) |       | 47 (40-56)                    |       | 37 (32.5-45)               |       |                      | <b>&lt;.001</b> |                               | <b>&lt;.001</b> |
| Race, ethnicity and ancestry     |            |       |                               |       |                            |       |                      |                 |                               |                 |
| African American/Black           | 1815       | 5.5%  | 37                            | 1.7%  | 0                          | 0.0%  | 0 (0-2.45)           | 0.40            | 0 (0-9.78)                    | >.99            |
| Ashkenazi Jewish                 | 2247       | 6.8%  | 92                            | 4.2%  | 1                          | 4.8%  | 0.49 (0.01-3.05)     | 0.72            | 0.93 (0.02-5.93)              | >.99            |
| Asian                            | 1071       | 3.2%  | 20                            | 0.9%  | 0                          | 0.0%  | 0 (0-4.15)           | >.99            | 0 (0-18.79)                   | >.99            |
| White                            | 21907      | 66.3% | 1707                          | 78.7% | 20                         | 95.2% |                      |                 |                               |                 |
| Hispanic                         | 1582       | 4.8%  | 66                            | 3.0%  | 0                          | 0.0%  | 0 (0-2.81)           | 0.64            | 0 (0-5.38)                    | >.99            |
| Other                            | 4409       | 13.4% | 246                           | 11.4% | 0                          | 0.0%  | 0 (0-1.01)           | 0.04***         | 0 (0-1.42)                    | 0.16            |
| Any Cancer                       |            |       |                               |       |                            |       | 8.64 (1.38-357.8)    | 0.008           | 6.05 (0.96-251.3)             | 0.06            |
| Yes                              | 23065      | 69.8% | 1664                          | 76.8% | 20                         | 95.2% |                      |                 |                               |                 |
| No                               | 9969       | 30.2% | 504                           | 23.3% | 1                          | 4.8%  |                      |                 |                               |                 |
| No. of primary cancer            |            |       |                               |       |                            |       |                      |                 |                               |                 |
| 0                                | 9969       | 30.2% | 504                           | 23.3% | 1                          | 4.8%  |                      |                 |                               |                 |
| 1                                | 18498      | 56.0% | 1348                          | 62.2% | 10                         | 47.6% |                      |                 |                               |                 |
| > 1                              | 4567       | 13.8% | 316                           | 14.6% | 10                         | 47.6% |                      | <b>&lt;.001</b> |                               | <b>&lt;.001</b> |
| Breast cancer**                  |            |       |                               |       |                            |       | Inf (4.18-Inf)       | <b>&lt;.001</b> | Inf (2.28-Inf)                | <b>&lt;.001</b> |
| Yes                              | 16029      | 52.7% | 1339                          | 67.1% | 20                         | 95.2% |                      |                 |                               |                 |
| No                               | 13584      | 44.6% | 620                           | 31.1% | 0                          | 0.0%  |                      |                 |                               |                 |
| Bilateral breast cancer**        |            |       |                               |       |                            |       | 5.26 (1.65-14.58)    | 0.003***        | 2.64 (0.82-7.39)              | 0.052           |
| Yes                              | 2228       | 7.3%  | 273                           | 13.7% | 6                          | 28.6% |                      |                 |                               |                 |
| No                               | 27345      | 89.9% | 1683                          | 84.4% | 14                         | 66.7% |                      |                 |                               |                 |
| Colorectal cancer                |            |       |                               |       |                            |       | 1.28 (0.14-5.33)     | 0.67            | 2.05 (0.23-8.75)              | 0.28            |
| Yes                              | 2575       | 7.8%  | 109                           | 5.0%  | 2                          | 9.5%  |                      |                 |                               |                 |
| No                               | 29550      | 89.5% | 2015                          | 92.9% | 18                         | 85.7% |                      |                 |                               |                 |
| Kidney cancer                    |            |       |                               |       |                            |       | 0 (0-30.43)          | >.99            | 0 (0-12.3)                    | >.99            |

|                   |       |       |      |       |    |       |                   |          |                   |         |
|-------------------|-------|-------|------|-------|----|-------|-------------------|----------|-------------------|---------|
| Yes               | 214   | 0.7%  | 36   | 1.7%  | 0  | 0.0%  |                   |          |                   |         |
| No                | 31896 | 96.6% | 2088 | 96.3% | 20 | 95.2% |                   |          |                   |         |
| Melanoma          |       |       |      |       |    |       | 2.72 (0.31-11.4)  | 0.18     | 3.82 (0.42-16.54) | 0.11    |
| Yes               | 1259  | 3.8%  | 60   | 2.8%  | 2  | 9.5%  |                   |          |                   |         |
| No                | 30854 | 93.4% | 2064 | 95.2% | 18 | 85.7% |                   |          |                   |         |
| Pancreatic cancer |       |       |      |       |    |       | 0 (0-10.73)       | >.99     | 0 (0-23.16)       | >.99    |
| Yes               | 597   | 1.8%  | 20   | 0.9%  | 0  | 0.0%  |                   |          |                   |         |
| No                | 31517 | 95.4% | 2104 | 97.1% | 20 | 95.2% |                   |          |                   |         |
| Thyroid cancer    |       |       |      |       |    |       | 7.96 (1.49-27.63) | 0.009*** | 4.88 (0.9-17.42)  | 0.03*** |
| Yes               | 696   | 2.1%  | 74   | 3.4%  | 3  | 14.3% |                   |          |                   |         |
| No                | 31416 | 95.1% | 2050 | 94.6% | 17 | 81.0% |                   |          |                   |         |

\**CHEK2* PV – pathogenic and likely pathogenic variants in *CHEK2* excluding the lower risk *CHEK2* variants: p.I157T, p.S428F and p.T476M

\*\*Denominator for sex-specific cancers was total number of females with given variant for breast and bilateral breast cancer.

\*\*\*After Bonferroni correction, this P value is not significant.

Abbreviations: CI, confidence interval; IQR, interquartile range; OR, odds ratio; PV, pathogenic or likely pathogenic variant; WT, wildtype

eTable7: Cohort Characteristics and Cancer Associations of LOF versus missense *CHEK2* pathogenic variants.

| Characteristic                       | LOF        |       | Missense     |       | LOF vs. Missense  |              |
|--------------------------------------|------------|-------|--------------|-------|-------------------|--------------|
|                                      | No.        | %     | No.          | %     | OR (95% CI)       | P value      |
| Age at first breast cancer (IQR)     | 48 (41-56) |       | 46.5 (40-54) |       |                   | 0.33         |
| Age at first cancer (IQR)            | 47 (40-56) |       | 46 (39-54)   |       |                   | 0.26         |
| Race, ethnicity and ancestry         |            |       |              |       |                   |              |
| African American/Black               | 34         | 1.8%  | 3            | 1.2%  | 1.38 (0.43-7.08)  | 0.79         |
| Ashkenazi Jewish                     | 88         | 4.6%  | 4            | 1.6%  | 2.67 (0.99-10.15) | 0.053        |
| Asian                                | 16         | 0.8%  | 4            | 1.6%  | 0.49 (0.15-2.02)  | 0.26         |
| White                                | 1522       | 79.1% | 185          | 75.8% |                   |              |
| Hispanic                             | 50         | 2.6%  | 16           | 6.6%  | 0.38 (0.21-0.73)  | <b>0.002</b> |
| Other                                | 214        | 11.1% | 32           | 13.1% | 0.81 (0.54-1.26)  | 0.33         |
| Any Cancer                           |            |       |              |       | 1.23 (0.89-1.68)  | 0.20         |
| Yes                                  | 1485       | 77.2% | 179          | 73.4% |                   |              |
| No                                   | 439        | 22.8% | 65           | 26.6% |                   |              |
| No. of primary cancer                |            |       |              |       |                   |              |
| 0                                    | 439        | 22.8% | 65           | 26.6% |                   |              |
| 1                                    | 1198       | 62.3% | 150          | 61.5% |                   |              |
| >1                                   | 287        | 14.9% | 29           | 11.9% |                   | 0.26         |
| Breast cancer                        |            |       |              |       | 1.16 (0.86-1.56)  | 0.33         |
| Yes                                  | 1195       | 67.4% | 144          | 65.2% |                   |              |
| No                                   | 544        | 30.7% | 76           | 34.4% |                   |              |
| Bilateral breast cancer              |            |       |              |       | 0.84 (0.57-1.24)  | 0.38         |
| Yes                                  | 238        | 13.4% | 35           | 15.8% |                   |              |
| No                                   | 1498       | 84.4% | 185          | 83.7% |                   |              |
| First breast cancer ER/PR positive** |            |       |              |       | 0.69 (0.21-1.77)  | 0.53         |
| Yes                                  | 747        | 92.6% | 90           | 94.7% |                   |              |
| No                                   | 60         | 7.4%  | 5            | 5.3%  |                   |              |
| First breast cancer HER2 positive    |            |       |              |       |                   |              |

|                   |      |        |     |       |                  |      |
|-------------------|------|--------|-----|-------|------------------|------|
| Yes               | 150  | 25.7%  | 18  | 27.3% | 0.92 (0.51-1.74) | 0.77 |
| No                | 434  | 74.3%  | 48  | 72.7% |                  |      |
| Colorectal cancer |      |        |     |       | 1.04 (0.56-2.12) | >.99 |
| Yes               | 97   | 5.0%   | 12  | 4.9%  |                  |      |
| No                | 1785 | 92.8%  | 230 | 94.3% |                  |      |
| Kidney cancer     |      |        |     |       | 1.03 (0.36-4.04) | >.99 |
| Yes               | 32   | 1.7%   | 4   | 1.6%  |                  |      |
| No                | 1850 | 96.2%  | 238 | 97.5% |                  |      |
| Melanoma          |      |        |     |       | 0.97 (0.43-2.57) | 0.84 |
| Yes               | 53   | 2.8%   | 7   | 2.9%  |                  |      |
| No                | 1829 | 95.1%  | 235 | 96.3% |                  |      |
| Pancreatic cancer |      |        |     |       | 0.73 (0.21-3.9)  | 0.49 |
| Yes               | 17   | 0.9%   | 3   | 1.2%  |                  |      |
| No                | 1865 | 96.9%  | 239 | 98.0% |                  |      |
| Thyroid cancer    |      |        |     |       | 0.93 (0.45-2.14) | 0.85 |
| Yes               | 65   | 3.4%   | 9   | 3.7%  |                  |      |
| No                | 1817 | 94.44% | 233 | 95.5% |                  |      |

Abbreviations: CI, confidence interval; IQR, interquartile range; LOF, loss of function; OR, odds ratio

eTable 8: Cancer Phenotype of Individual *CHEK2* PVs: R117G, c.1100del, ex8-9del, and c.444+1G>A compared to Wildtype and Other *CHEK2* PVs

| Characteristic                   | <u>p.R117G</u> | <u>R117G vs. WT</u> |                       | <u>R117G vs. Other PV*</u> |                       | <u>c.444+1G &gt;A</u> | <u>c.444+1G&gt;A vs. WT</u> |                       | <u>c.444+1G&gt;A vs. Other PV*</u> |                       |
|----------------------------------|----------------|---------------------|-----------------------|----------------------------|-----------------------|-----------------------|-----------------------------|-----------------------|------------------------------------|-----------------------|
|                                  | (n=125)        | <i>P</i> value      | <i>P</i> value        | <i>P</i> value             | <i>P</i> value        | (n=92)                | <i>P</i> value              | <i>P</i> value        | <i>P</i> value                     | <i>P</i> value        |
| Age at first breast cancer (IQR) | 46.5 (41--55)  | <b>0.03</b>         |                       | 0.61                       |                       | 50 (44-59)            | 0.84                        |                       | 0.15                               |                       |
| Age at first cancer (IQR)        | 47 (40-55)     | 0.07                |                       | 0.70                       |                       | 49 (44-58)            | 0.88                        |                       | 0.11                               |                       |
|                                  | <b>No. (%)</b> | <b>OR (95% CI)</b>  | <b><i>P</i> value</b> | <b>OR (95% CI)</b>         | <b><i>P</i> value</b> | <b>No. (%)</b>        | <b>OR (95% CI)</b>          | <b><i>P</i> value</b> | <b>OR (95% CI)</b>                 | <b><i>P</i> value</b> |
| Any Cancer                       | 91 (72.8%)     | 1.16 (0.77-1.77)    | 0.50                  | 0.8 (0.53, 1.24)           | 0.28                  | 73 (79.4%)            | 1.66 (0.99, 2.92)           | 0.053                 | 1.17 (0.69-2.08)                   | 0.62                  |
| No. of primary cancer            |                |                     |                       |                            |                       |                       |                             |                       |                                    |                       |
| 0                                | 34 (27.2%)     |                     |                       |                            |                       | 19 (20.7%)            |                             |                       |                                    |                       |
| 1                                | 71 (56.8%)     |                     |                       |                            |                       | 54 (58.7%)            |                             |                       |                                    |                       |
| >1                               | 20 (16.0%)     |                     | 0.64                  |                            | 0.40                  | 19 (20.7%)            |                             | 0.06                  |                                    | 0.23                  |
| Breast cancer**                  | 74 (65.6%)     | 1.65 (1.12-2.44)    | 0.01**<br>*           | 0.90 (0.60-1.34)           | 0.59                  | 62 (73.8%)            | 2.63 (1.59-4.35)            | < .001                | 1.46 (0.87-2.43)                   | 0.15                  |
| Bilateral breast cancer**        | 17 (15.0%)     | 2.20 (1.31-3.69)    | <b>0.002</b>          | 1.11 (0.65-1.89)           | 0.70                  | 19 (22.6%)            | 3.70 (2.21-6.19)            | < .001                | 1.92 (1.13-3.27)                   | 0.01**<br>*           |
| Colorectal cancer                | 5 (4.0%)       | 0.49 (0.15-1.17)    | 0.13                  | 0.77 (0.24-1.92)           | 0.83                  | 4 (4.4%)              | 0.53 (0.14-1.42)            | 0.33                  | 0.85 (0.22-2.34)                   | 1.0                   |
| Kidney cancer                    | 3 (2.4%)       | 3.73 (0.75-11.3)    | 0.051                 | 1.49 (0.29-4.86)           | 0.46                  | 2 (2.2%)              | 3.39 (0.4-12.75)            | 0.12                  | 1.34 (0.15-5.36)                   | 0.66                  |
| Melanoma                         | 4 (3.2%)       | 0.82 (0.22-2.17)    | >.99                  | 1.17 (0.3-3.24)            | 0.78                  | 4 (4.4%)              | 1.14 (0.3, 3.03)            | 0.78                  | 1.64 (0.42, 4.6)                   | 0.32                  |
| Pancreatic cancer                | 2 (1.6%)       | 0.87 (0.1-3.23)     | >.99                  | 1.82 (0.2-7.75)            | 0.32<br>4             | 0 (0.0%)              | 0 (0-2.22)                  | 0.42                  | 0 (0-4.62)                         | >.99                  |

|                |          |                  |        |                  |       |          |                  |      |               |     |
|----------------|----------|------------------|--------|------------------|-------|----------|------------------|------|---------------|-----|
| Thyroid cancer | 8 (6.4%) | 3.14 (1.32-6.43) | 0.006* | 2.04 (0.83-4.39) | 0.072 | 3 (3.3%) | 1.56 (0.31-4.72) | 0.45 | 0.95 (0.19-3) | 1.0 |
|----------------|----------|------------------|--------|------------------|-------|----------|------------------|------|---------------|-----|

| Characteristic                   | c.1100del<br>(n=1252) | c.1100del vs. WT |         |                  | c.1100del vs. Other |             | Ex8-9del<br>(n=113) | Ex8-9del vs. WT   |             | Ex8-9del vs. Other |      |
|----------------------------------|-----------------------|------------------|---------|------------------|---------------------|-------------|---------------------|-------------------|-------------|--------------------|------|
|                                  |                       | OR (95% CI)      | P value | OR (95% CI)      | P value             | OR (95% CI) |                     | P value           | OR (95% CI) | P value            |      |
| Age at first breast cancer (IQR) | 48 (41-56)            |                  | < .001  |                  | 0.37                |             | 47.5 (40-55)        |                   | 0.03        |                    | 0.72 |
| Age at first cancer (IQR)        | 47 (40-56)            |                  | < .001  |                  | 0.88                |             | 47 (40-54.5)        |                   | 0.06        |                    | 0.65 |
| Any Cancer                       | 956 (76.4%)           | 1.4 (1.22-1.6)   | < .001  | 0.95 (0.77-1.17) | 0.64                |             | 91 (80.5%)          | 1.79 (1.11-2.99)  | 0.01        | 1.27 (0.78-2.15)   | 0.36 |
| No. of primary cancer            |                       |                  |         |                  |                     |             |                     |                   |             |                    |      |
| 0                                | 296 (23.7%)           |                  |         |                  |                     |             | 22 (19.5%)          |                   |             |                    |      |
| 1                                | 771 (61.6%)           |                  |         |                  |                     |             | 75 (66.4%)          |                   |             |                    |      |
| >1                               | 185 (14.8%)           |                  | < .001  |                  | 0.81                |             | 16 (14.2%)          |                   | 0.03        |                    | 0.61 |
| Breast cancer**                  | 760 (66.3%)           | 1.76 (1.55-2.00) | < .001  | 0.92 (0.76-1.11) | 0.38                |             | 78 (72.9%)          | 2.36 (1.53-3.64)  | < .001      | 1.31 (0.84-2.04)   | 0.23 |
| Bilateral breast cancer**        | 155 (13.5%)           | 1.97 (1.65-2.34) | < .001  | 0.97 (0.75-1.26) | 0.83                |             | 16 (15.0%)          | 2.18 (1.28-3.72)  | 0.003**     | 1.10 (0.64-1.91)   | 0.73 |
| Colorectal cancer                | 69 (5.5%)             | 0.69 (0.53-0.88) | 0.002   | 1.29 (0.85-1.97) | 0.23                |             | 4 (3.5%)            | 0.43 (0.11-1.12)  | 0.11        | 0.67 (0.18-1.83)   | 0.66 |
| Kidney cancer                    | 25 (2.0%)             | 3.11 (1.96-4.74) | < .001  | 1.69 (0.8-3.82)  | 0.17                |             | 2 (1.8%)            | 2.71 (0.32-10.14) | 0.17        | 1.06 (0.12-4.22)   | 0.71 |
| Melanoma                         | 38 (3.0%)             | 0.79 (0.55-1.09) | 0.17    | 1.28 (0.73-2.29) | 0.427               |             | 3 (2.7%)            | 0.67 (0.14-2.03)  | 0.80        | 0.94 (0.19-2.98)   | >.99 |
| Pancreatic cancer                | 11 (0.9%)             | 0.48 (0.24-0.87) | 0.01**  | 0.9 (0.34-2.47)  | 0.82                |             | 1 (0.9%)            | 0.48 (0.01-2.72)  | 0.73        | 0.95 (0.02-6.06)   | >.99 |

|                |           |                 |              |                 |      |          |                  |      |                  |      |
|----------------|-----------|-----------------|--------------|-----------------|------|----------|------------------|------|------------------|------|
| Thyroid cancer | 44 (3.5%) | 1.68 (1.21-2.3) | <b>0.002</b> | 1.08 (0.66-1.8) | 0.81 | 4 (3.5%) | 1.67 (0.45-4.42) | 0.31 | 1.03 (0.27-2.83) | 0.80 |
|----------------|-----------|-----------------|--------------|-----------------|------|----------|------------------|------|------------------|------|

\*Other PV: pathogenic and likely pathogenic variants in CHEK2 excluding the variant being compared.

\*\*Denominator for sex-specific cancers was total number of females with given variant for breast and bilateral breast cancer.

\*\*\*After Bonferroni correction, this P value is not significant.

Abbreviations: CI, confidence interval; IQR, interquartile range; OR, odds ratio; PV, pathogenic or likely pathogenic variant; WT, wildtype
